# Supplementary material for: A novel extra-broadband visible-emitting garnet phosphor for efficient single-component pc-WLEDs
Source: Royal Society of Chemistry journal article supplement (doi:10.1039/d4qi01824a), 2024-01-01
Supplement: d4qi01824a1.pdf [file d4qi01824a1.pdf]

## **A Novel Extra-Broadband Visible Emitting Garnet Phosphor toward Efficient Single Component Pc-WLED**

Qianyi Chen,<sup>a, #</sup> Zhenjie Lun,<sup>a, #</sup> Dongdan Chen,<sup>a, \*</sup> Yongsheng Sun,<sup>a</sup> Puxian Xiong,<sup>a, c</sup> Siyun Li,<sup>a</sup>  
Shanhui Xu<sup>a, \*</sup> and Zhongmin Yang<sup>a, b</sup>

<sup>a</sup> *School of Physics and Optoelectronics, State Key Laboratory of Luminescent Materials and Devices, School of Materials Science and Engineering, Guangdong Engineering Technology Research Center of Special Optical Fiber Materials and Devices, Guangdong Provincial Key Laboratory of Fiber Laser Materials and Applied Techniques, Institute of Optical Communication Materials, South China University of Technology, Guangzhou 510641, China.*

<sup>b</sup> *South China Normal University, Guangzhou 510641, China.*

E-mail: [ddchen@scut.edu.cn](mailto:ddchen@scut.edu.cn); [flxshy@scut.edu.cn](mailto:flxshy@scut.edu.cn)

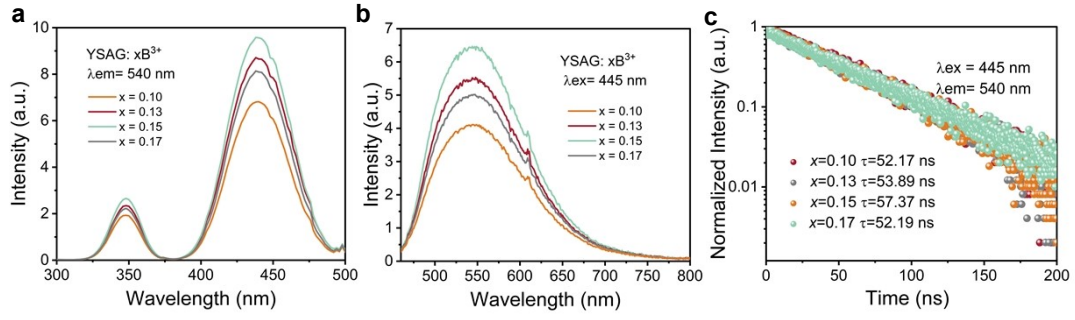

**Figure S1. B<sup>3+</sup>-concentration dependent luminous properties of YSAG: xB<sup>3+</sup> (x = 0.10- 0.17) samples. a** PLE and **b** PL spectra. **c** The decay curves at RT of YSAG: xB<sup>3+</sup> (x=0.10 to 0.17) under 445 nm excitation monitored.

The lifetime was calculated by using Equation (1), as follows<sup>1</sup>:

$$I(t) = I_o + A_1 \exp(-t / \tau_1) + A_2 \exp(-t / \tau_2) \quad (1)$$

The average life value can be subsequently found as follows:

$$\tau^* = \frac{A_1 \tau_1^2 + A_2 \tau_2^2}{A_1 \tau_1 + A_2 \tau_2} \quad (2)$$

where  $I(t)$  refer to the time-dependent intensity,  $\tau$  represents the lifetime values of different decay components and  $A_1$  and  $A_2$  are fitting constants.

**Table S1.** XRF results of YSAG: 0.15B<sup>3+</sup>.

| <b>Analyte</b> | <b>Calibration</b> | <b>Compound formula</b>        | <b>Concentration</b> |
|----------------|--------------------|--------------------------------|----------------------|
| Al             | Calibrated         | Al <sub>2</sub> O <sub>3</sub> | 24.280%              |
| Y              | Calibrated         | Y <sub>2</sub> O <sub>3</sub>  | 52.730%              |
| Sc             | Calibrated         | Sc <sub>2</sub> O <sub>3</sub> | 21.984%              |
| Si             | Calibrated         | SiO <sub>2</sub>               | 0.177%               |
| S              | Calibrated         | SO <sub>3</sub>                | 0.028%               |
| Ca             | Calibrated         | CaO                            | 0.036%               |
| Fe             | Calibrated         | Fe <sub>2</sub> O <sub>3</sub> | 0.031%               |
| Ni             | Calibrated         | NiO                            | 0.317%               |
| Ge             | Calibrated         | GeO <sub>2</sub>               | 0.372%               |
| Sm             | Calibrated         | Sm <sub>2</sub> O <sub>3</sub> | 0.040%               |
| W              | Calibrated         | WO <sub>3</sub>                | 0.125%               |

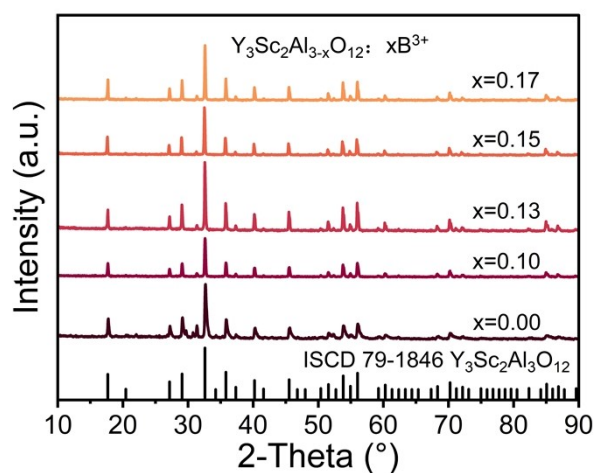

**Figure S2. Phase confirmation of YSAG:  $x\text{B}^{3+}$  ( $x = 0.00\text{-}0.17$ ) samples at room temperature.** The X-ray diffraction peaks could be well indexed with the standard card of  $\text{Y}_3\text{Sc}_2\text{Al}_3\text{O}_{12}$  (PDF No. 79-1846), thereby indicating the formation of a targeted phase.

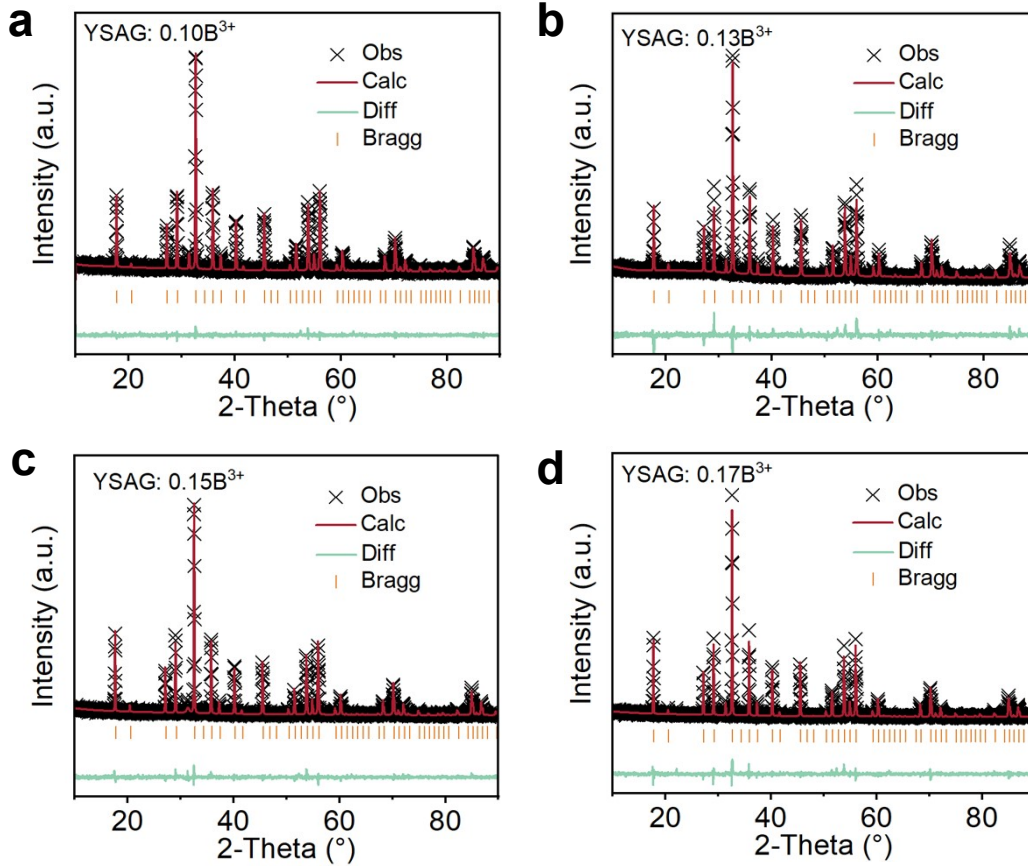

**Figure S3.** The Rietveld refinement XRD patterns of YSAG:  $x\text{B}^{3+}$  ( $x = 0.00, 0.10, 0.13$  and  $0.17$ ) samples

**Table S2** Crystallographic data of  $\text{Y}_3\text{Sc}_2\text{Al}_3\text{O}_{10}: x\text{B}^{3+}$  ( $x = 0.0, 0.10, 0.13, 0.15$  and  $0.17$ ) samples based on Rietveld refinements.

| Formula                   | $x=0.0$  | $x=0.10$ | $x=0.13$ | $x=0.15$ | $x=0.17$ |
|---------------------------|----------|----------|----------|----------|----------|
| Crystal system            | Cubic    | Cubic    | Cubic    | Cubic    | Cubic    |
| Space group               | Ia3d     | Ia3d     | Ia3d     | Ia3d     | Ia3d     |
| $a=b=c$ (Å)               | 12.252   | 12.277   | 12.280   | 12.292   | 12.297   |
| $\alpha=\beta=\gamma$ (°) | 90       | 90       | 90       | 90       | 90       |
| volume (Å <sup>3</sup> )  | 1839.456 | 1850.666 | 1851.913 | 1857.189 | 1859.435 |
| Z                         | 16       | 16       | 16       | 16       | 16       |
| $R_{\text{wp}}$ (%)       | 14.202   | 11.251   | 9.196    | 10.979   | 11.710   |
| GOF                       | 2.40     | 1.27     | 1.34     | 1.27     | 1.36     |
| $\chi^2$                  | 5.78     | 1.60     | 1.81     | 1.61     | 1.85     |

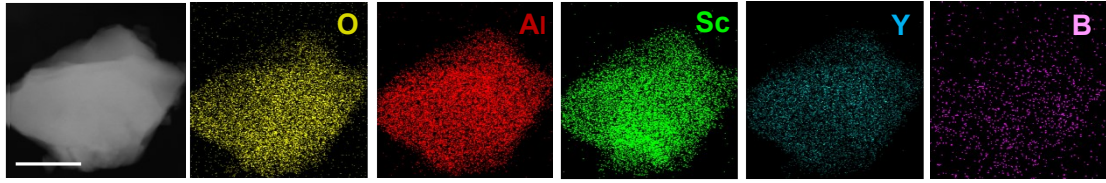

**Figure S4.** TEM image of the YSAG: 0.15B<sup>3+</sup> single particle and its component elemental maps (scale bar: 100 nm).

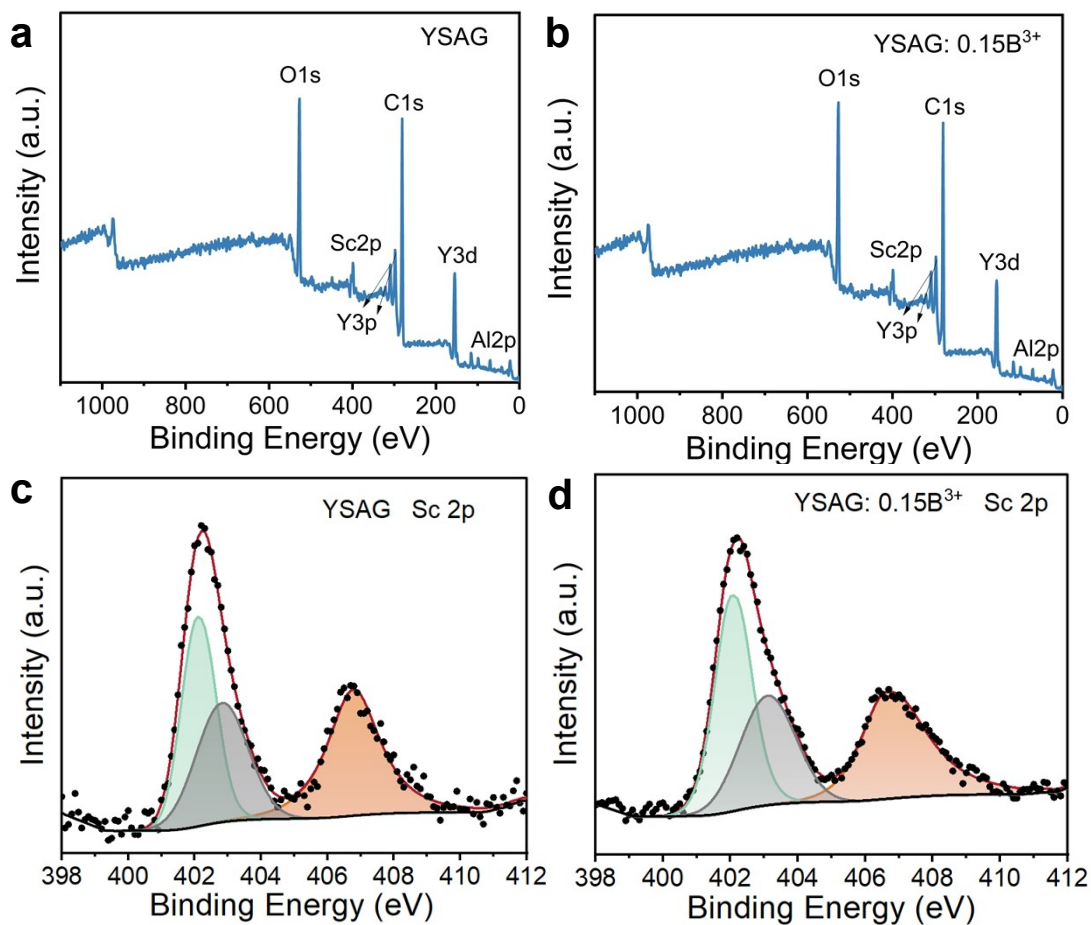

**Figure S5.** The XPS survey scan of YSAG and YSAG: 0.15B<sup>3+</sup>. **a-b** full spectrum scanning. **c--d** XPS analysis of the Sc 2p orbital.

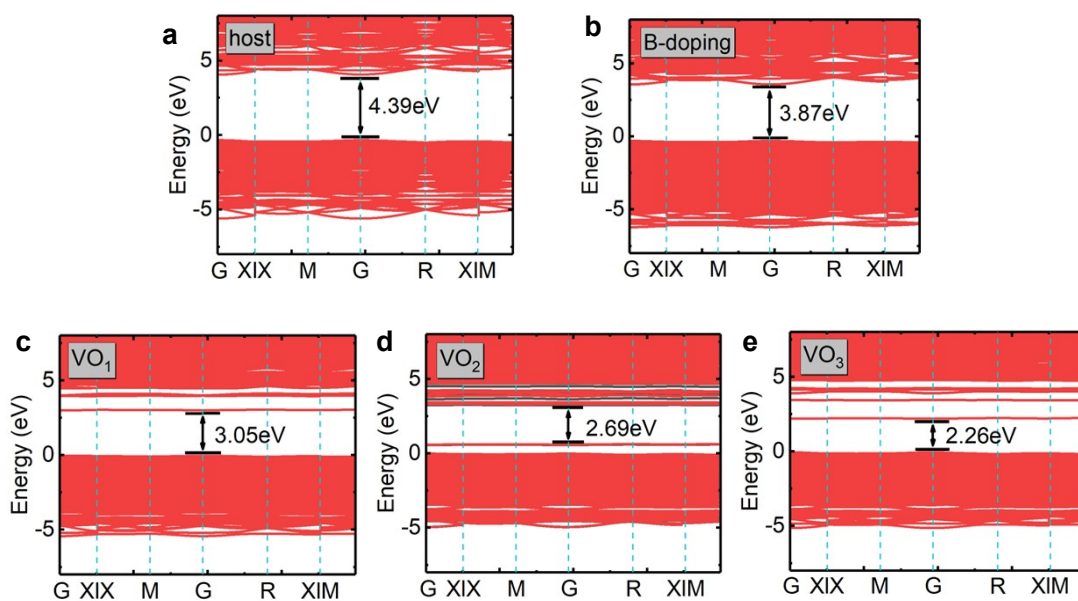

**Figure S6.** Band structure of **a** YAG matrix and **b** YAG: B<sup>3+</sup> without oxygen vacancy. **c-e** Band structure of YAG: B<sup>3+</sup> with oxygen vacancies.



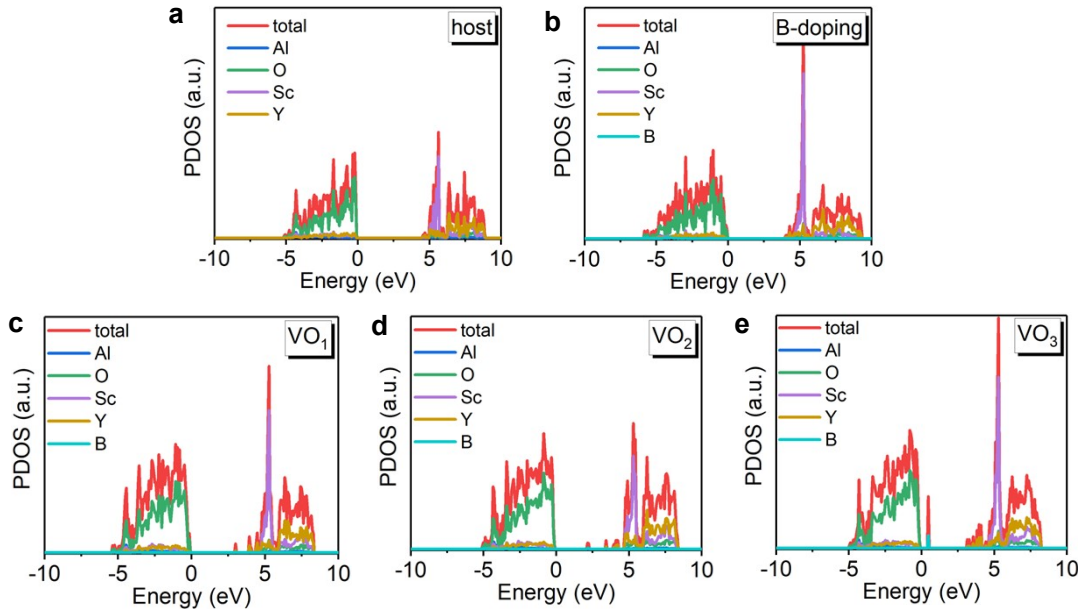

**Figure S7.** PDOS of YSAG matrix and YSAG: B<sup>3+</sup> without and with oxygen vacancies.

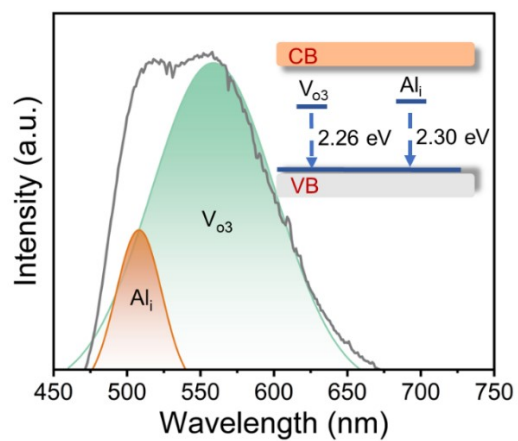

**Figure S8.** The Gaussian fitting peak of the representative YSAG: 0.15B<sup>3+</sup> sample

## Reference

1. Q. Chen, M. Wu, P. Xiong, Y. Zhao, S. Tian, Y. Xiao, Y. Sun, D. Chen, S. Xu and Z. Yang, Efficient and Broadband Emission in Dy<sup>3+</sup>-Doped Glass-Ceramic Fibers for Tunable Yellow Fiber Laser, *Nanomaterials*, 2023, **13**.
